# Supplementary material
Source: Springer Nature journal article supplement (https://www.springermedizin.de/resource/supplementary/12961_2013_343_MOESM9_ESM.pdf/9571088)

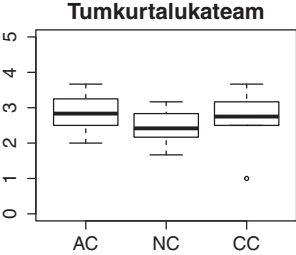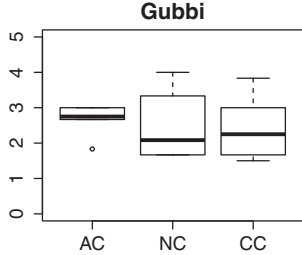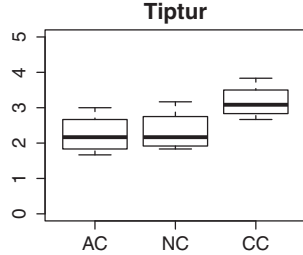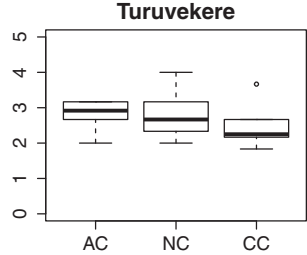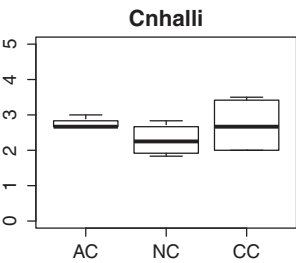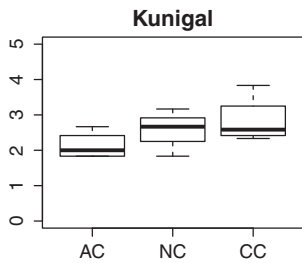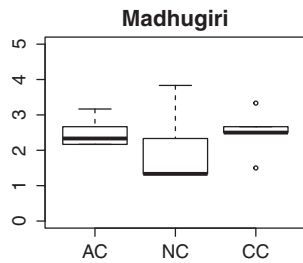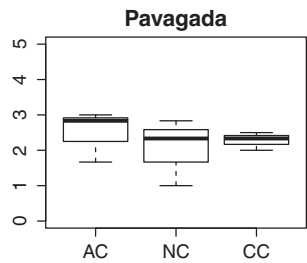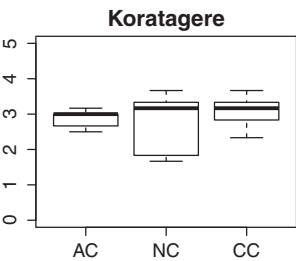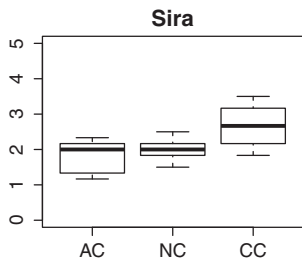

Supplement: MOESM9 [file 9571088]
